# Supplementary material for: Mushroom-mimetic 3D hierarchical architecture-based e-skin with high sensitivity and a wide sensing range for intelligent perception
Source: Royal Society of Chemistry journal article supplement (doi:10.1039/d3mh00679d), 2023-01-01
Supplement: d3mh00679d1.pdf [file d3mh00679d1.pdf]

## Supporting Information

### **Mushroom-mimetic 3D hierarchical architecture-based e-skin with high sensitivity and wide sensing range for intelligent perception**

*Yajie Zhang, Xinyu Zhang, Chuan Ning, Kun Dai, Guoqiang Zheng,\* Chuntai Liu, Changyu Shen*

College of Materials Science and Engineering, National Engineering Research Center for Advanced Polymer Processing Technology, Zhengzhou University, Zhengzhou 450001, PR China

E-mail addresses: gqzheng@zzu.edu.cn (G. Zheng).



**Fig. S1.** SEM images of (a) punched plate, (b) mesh sieve and (c) punched plate stacked with mesh sieve.



**Fig. S2.** SEM images of CNTs networks on the surface of MMTC sprayed for (a) 4, (b) 5, (c) 6 and (d) 7 times.



**Fig. S3.** (a) Side view SEM images of MMTc sprayed for 6 times. SEM images of CNTs networks on (b) top, (c) side wall and (d) bottom of micropattern.



**Fig. S4.** The dimensions of the interdigital electrode.



**Fig. S5.** The linear resistance per centimeter of as-prepared interdigital electrode.



**Fig. S6.** The linear resistance per centimeter of interdigital electrode after 100 cycles bending/recovery test.



**Fig. S7.** (a) SEM images of punched plate stacked with mesh sieve. (b) Top view SEM images of the as-prepared interdigital electrode. (c) A diagram showing the distribution of mushroom-mimetic micropatterns on the as-prepared interdigital electrode. (d) Side view SEM images of MMTC. (e) Cross sectional view SEM image of the as-prepared interdigital electrode. (f) Schematic diagram of the structure of MMTC/interdigital electrode e-skin.



**Fig. S8.** Sensitivity of MMTC/interdigital electrode e-skins based on MMTC sprayed with CNTs dispersion for different times.



**Fig. S9.** (a, b) Picture of the home-made shear test equipment. (c) The e-skin was subjected to shear at a loading of 0.22 N for 700 cycles.



**Fig. S10.** Digital images displaying the index finger bending to different angles in air and under water. MMTC/interdigital electrode e-skin was simply packaged and attached on index finger bending to different angles in air or under water.



**Fig. S11.** Response of the index finger bending to different angles (from 30° to 150°) both in air (left side) and under water (right side).



**Fig. S12.** (a, b) Schematic diagram of underwater communication based on the principle of Morse code.

| <b>Mechanism</b>     | <b>Sensitivity<br/>(kPa<sup>-1</sup>)</b> | <b>Maximum<br/>sensing<br/>range(kPa)</b> | <b>Detection<br/>limit (Pa)</b> | <b>Response<br/>time (ms)</b> | <b>Cycles</b> | <b>Reference</b>                 |
|----------------------|-------------------------------------------|-------------------------------------------|---------------------------------|-------------------------------|---------------|----------------------------------|
| Pizoresistive        | 442                                       | 18.56                                     | 9                               | 138                           | 10000         | <a href="#">41</a>               |
| Pizoresistive        | 151.4                                     | 15                                        | 4.4                             | 125                           | 10000         | <a href="#">42</a>               |
| Pizoresistive        | 509.8                                     | 20                                        | 1                               | 67.3                          | 10000         | <a href="#">43</a>               |
| Pizoresistive        | 99.5                                      | 4.5                                       | 9                               | 4                             | 10000         | <a href="#">44</a>               |
| Pizoresistive        | 403.46                                    | 10                                        | 0.88                            | 105.3                         | 12000         | <a href="#">45</a>               |
| Pizoresistive        | 649.3                                     | 20.55                                     | 4                               | 123                           | 10000         | <a href="#">46</a>               |
| Pizoresistive        | 196                                       | 100                                       | 0.5                             | 26                            | 10000         | <a href="#">47</a>               |
| Pizoresistive        | 191.3                                     | 60                                        | 8                               | 80                            | 18000         | <a href="#">48</a>               |
| Pizoresistive        | 298.4                                     | 39.3                                      | 7.1                             | 7                             | 10000         | <a href="#">49</a>               |
| <b>Pizoresistive</b> | <b>600</b>                                | <b>150</b>                                | <b>5</b>                        | <b>20</b>                     | <b>15000</b>  | <b><a href="#">This work</a></b> |

**Table S1.** Performance comparison of different e-skins.
